# Supplementary material for: Ultrasonic synthesis of highly dispersed Au nanoparticles supported on Ti-based metal–organic frameworks for electrocatalytic oxidation of hydrazine
Source: Royal Society of Chemistry journal article supplement (doi:10.1039/c5ta03090k), 2015-01-01
Supplement: c5ta03090k1.pdf [file c5ta03090k1.pdf]

## Supplementary materials

### **Ultrasonic Synthesis of Highly Dispersed Au Nanoparticles supported on Ti-based Metal-organic Frameworks for Electrocatalytic Oxidation of Hydrazine**

Yujie Han,<sup>ab</sup> Lei Han,<sup>a</sup> Lingling Zhang,<sup>ab</sup> and Shaojun Dong<sup>\*ab</sup>

*<sup>a</sup>State Key Laboratory of Electroanalytical Chemistry, Changchun Institute of Applied Chemistry,  
Chinese Academy of Sciences, Changchun, Jilin, 130022 (China)*

*<sup>b</sup>University of Chinese Academy of Sciences, Beijing, 100049 (China)*

*\* Corresponding author: Prof. Shaojun Dong, Email: E-mail: dongsj@ciac.ac.cn*

**Table S1** Comparison of analytical parameters for electrochemistry detection of N<sub>2</sub>H<sub>4</sub> at Au/NH<sub>2</sub>-MIL-125(Ti)/GCE with other composites modified electrodes.

| Electrode                           | Method      | Detection limit<br>( $\mu\text{M}$ ) | Linear Range<br>( $\mu\text{M}$ ) | Ref.            |
|-------------------------------------|-------------|--------------------------------------|-----------------------------------|-----------------|
| AuNP-GPE                            | Amperometry | 3.07                                 | 0.05-250                          | 1               |
| Au/PPy/GCE                          | LSV         | 0.10                                 | 0.5-500                           | 2               |
| GNPs/Ch/GCE                         | DPV         | 0.10                                 | 0.5-500                           | 3               |
| HMWCNT/GCE                          | DPV         | 0.68                                 | 2.0-123                           | 4               |
| HTP-MWCNT-CPE                       | LSV         | 0.13                                 | 1.0-6000                          | 5               |
| Au/ZnO-MWCNTs/GCE                   | Amperometry | 0.15                                 | 0.5-1800                          | 6               |
| Ni(II)/BA/MWCNTs/PE                 | Amperometry | 0.810                                | 2.5-200                           | 7               |
| AuNPs/poly(BCP/CNT)/GCE             | LSV         | 0.1                                  | 0.5-1000                          | 8               |
| GR-Bi nanocomposite                 | Amperometry | 0.005                                | 0.02-280                          | 9               |
| Quinizarine/TiO <sub>2</sub> NPs    | DPV         | 0.077                                | 0.5-1900                          | 10              |
| Au/NH <sub>2</sub> -MIL-125(Ti)/GCE | Amperometry | 0.0005                               | 0.01-100                          | Present<br>work |

LSV, linear sweep voltammetry; DPV, differential plus voltammetry; HMWCNT, hematoxylin multi-wall carbon nanotubes; MWCNT, Multiwalled carbon nanotubes; Ni(II)/BA/MWCNTs/PE, Ni(II)-baicalein multiwalled carbon nanotube paste electrode; GR-Bi nanocomposite, bismuth nanoparticles (Bi) decorated graphene nanosheets nanocomposite.

## Reference

- 1 A. M. Abdul and A.N. Kawde, *Talanta* 2013, **115**, 214-221.
- 2 J. Li and X. Q. Lin, *Sensor. Actuat. B-Chem.*, 2007, **126**, 527-535.
- 3 J. Li; H. Q. Xie and L. F. Chen, *Sensor. Actuat. B-Chem.*, 2011, **153**, 239-245.
- 4 H. R. Zare and N. Nasirizadeh, *Electrochimica Acta*, 2007, **52**, 4153-4160.

- 5 H. R. Zare, M. R. Shishehbore, D. Nematollahi and M. S. Tehrani, *Sensor. Actuat. B-Chem.*, 2010, **151**, 153-161.
- 6 C. H. Zhang, G. F. Wang, Y. L. Ji, M. Liu, Y. H. Feng, Z. D. Zhang and B. Fang, *Sensor. Actuat. B-Chem.*, 2010, **150**, 247-253.
- 7 L. Zheng and J. F. Song, *Talanta*, 2009, **79**, 319-326.
- 8 S. Koçak and B. Aşlışen, *Sensor. Actuat. B-Chem.*, 2014, **196**, 610-618.
- 9 R. Devasenathipathy, V. Mani and S. M. Chen, *Talanta*, 2014, **124**, 43-51.
- 10 M. Mazloum-Ardakani, Z. Taleat, H. Beitollahi and H. Naeimi, *Nanoscale*, 2011, **3**, 1683-1689.
